# Supplementary material
Source: publisher figshare collection journal article supplement (https://tandf.figshare.com/articles/dataset/_/24903348)

**A**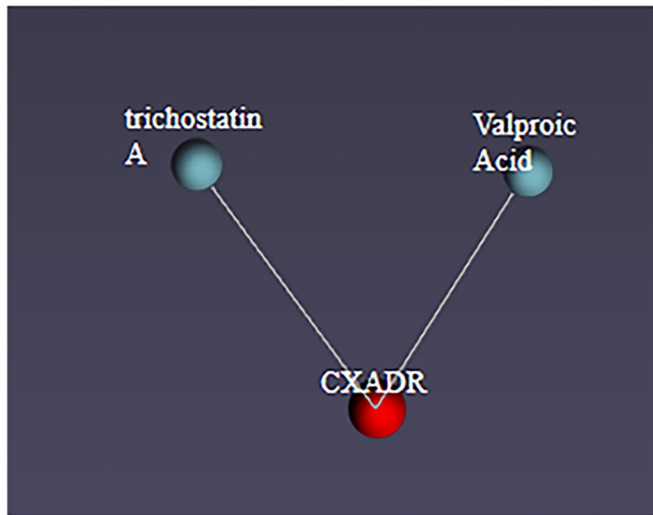**B**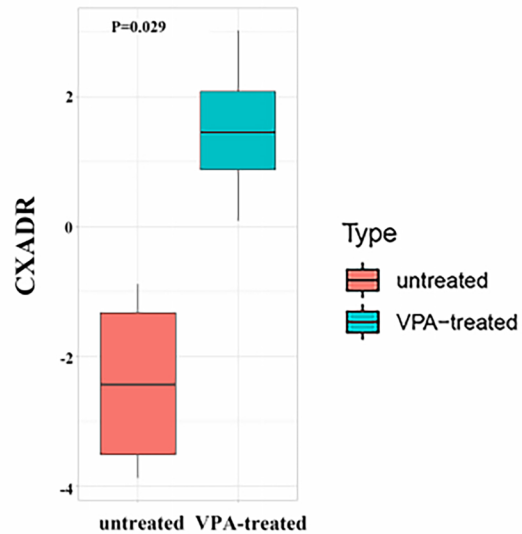

Supplement: Supplementary file 1 [file 1]
